# Supplementary material for: Late-Onset Psoriatic Arthritis: Are There Any Distinct Characteristics? A Retrospective Cohort Data Analysis
Source: Life (Basel). 2023 Mar 15;13(3):792. doi: 10.3390/life13030792 (PMC10058512; doi:10.3390/life13030792)
Supplement: Supplementary file 1 [file life-13-00792-s001.zip › life-2226890-supplementary.pdf]

Supplementary material

Figure S1 Histogram of the age at PsA diagnosis of the entire cohort.

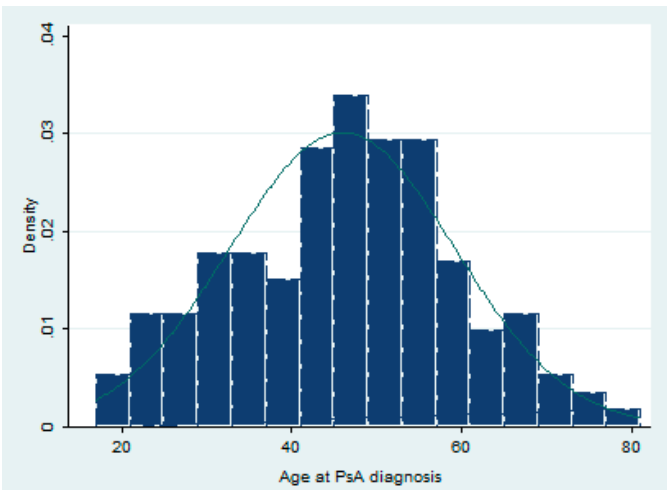

Figure S2 Histogram of the age at PsA diagnosis by study group (late-onset vs earlier-onset PsA).

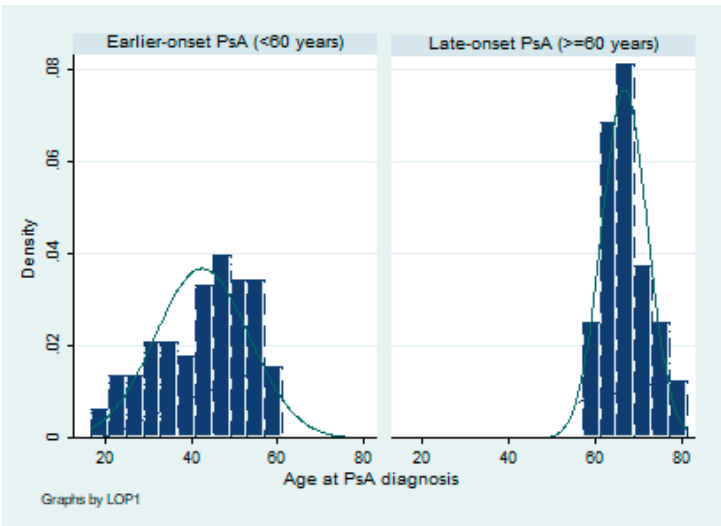

**Table S1** Characteristics of patients included in the study (N=281). Comparison of patients diagnosed after the age of >46 years with those who were diagnosed at an age of ≤46 years.

|                                         | Age at diagnosis<br>≤46 years<br>N= 134 | Age at diagnosis<br>>46 years<br>N= 147 | p-value          |
|-----------------------------------------|-----------------------------------------|-----------------------------------------|------------------|
| <b>Demographic characteristics</b>      |                                         |                                         |                  |
| Gender, males, n (%)                    | 60 (44.8)                               | 58 (39.5)                               | 0.367            |
| Age at PsA diagnosis, mean ± SD         | 34.6 ± 8.0                              | 56.1 ± 7.6                              | <b>&lt;0.001</b> |
| BMI (kg/m <sup>2</sup> ), mean ± SD     | 27.8 ± 6.1                              | 28.8 ± 5.1                              | 0.187            |
| Family history of PsO, n (%)            | 36/121 (29.8) *                         | 40/129 (31.0) §                         | 0.829            |
| Family history of SpA, n (%)            | 4/116 (3.4) §                           | 9/127 (7.1) §                           | 0.208            |
| Smoking (ever/never), n (%)             | 62/126 (49.2) *                         | 60/138 (43.5) *                         | 0.351            |
| Disease duration (months), median (IQR) | 74.0 (27.1-154.0)                       | 33.5 (9.0-102.0)                        | <b>0.001</b>     |
| <b>Clinical features at diagnosis</b>   |                                         |                                         |                  |
| Axial disease, n (%)                    | 26/115 (22.6) §                         | 25/140 (17.9)*                          | 0.345            |
| Peripheral arthritis, n (%)             | 107/116 (92.2) §                        | 120/128 (93.8) §                        | 0.644            |
| 66/68 TJC, mean ± SD                    | 5 (2-7)                                 | 5 (4-8)                                 | 0.196            |
| 66/68 SJC, median (IQR)                 | 2 (1-4)                                 | 2 (2-4)                                 | 0.800            |
| Skin psoriasis, n (%)                   | 63/87 (72.4) ¥                          | 79/106 (74.5) ¥                         | 0.740            |
| Enthesitis, n (%)                       | 16/89 (18.0) ¥                          | 11/107 (10.3) ¥                         | 0.120            |
| Dactylitis, n (%)                       | 13/92 (14.1) ¥                          | 11/110 (10.0) ¥                         | 0.366            |
| Inflammatory bowel disease, n (%)       | 1/132 (0.8)*                            | 1/143 (0.7)*                            | 0.955            |
| <b>Ever present clinical features</b>   |                                         |                                         |                  |
| Axial disease, n (%)                    | 56 (41.8)                               | 47 (32.0)                               | 0.088            |
| Peripheral arthritis, n (%)             | 129 (96.3)                              | 143 (97.3)                              | 0.631            |
| Skin psoriasis, n (%)                   | 127 (94.8)                              | 142 (96.6)                              | 0.633            |
| Nail psoriasis, n (%)                   | 49 (36.6)                               | 69 (46.9)                               | 0.070            |
| Enthesitis, n (%)                       | 46 (34.3)                               | 40 (27.2)                               | 0.196            |
| Dactylitis, n (%)                       | 33 (24.6)                               | 30 (20.4)                               | 0.397            |
| Uveitis, n (%)                          | 6 (4.5)                                 | 1 (0.7)                                 | 0.056            |
| Inflammatory bowel disease, n (%)       | 4 (3.0)                                 | 8 (5.4)                                 | 0.309            |
| <b>Comorbidities</b>                    |                                         |                                         |                  |
| Hypertension, n (%)                     | 26 (19.4)                               | 70/145 (48.3)*                          | <b>&lt;0.001</b> |
| Dyslipidemia, n (%)                     | 50/133 (37.6)*                          | 95/146 (65.1)*                          | <b>&lt;0.001</b> |
| Diabetes, n (%)                         | 15/132 (13.4)*                          | 36/145 (24.8)*                          | <b>0.004</b>     |
| Obesity, n (%)                          | 32/117 (27.4) §                         | 41/122 (33.6) §                         | 0.294            |
| MACE, n (%)                             | 5 (3.7)                                 | 16/145 (11.0)*                          | <b>0.021</b>     |
| Depression, n (%)                       | 32/131 (24.4)*                          | 38/143 (26.6)*                          | 0.684            |
| <b>Treatments ever received</b>         |                                         |                                         |                  |
| csDMARDs (total number), median (IQR)   | 1 (1-2)                                 | 1 (1-1)                                 | 0.146            |
| bDMARDs (total number), median (IQR)    | 1 (0-2)                                 | 1 (0-2)                                 | 0.077            |
| Steroids, n (%)                         | 66/129 (51.2)*                          | 79/136 (58.1)*                          | 0.527            |

\*Missing data ≤10%.

§Missing data 10-20%.

¥Missing data >20%.

Axial disease was defined as having sacroiliitis and/or spondylitis, which were radiologically confirmed in addition to relevant clinical symptomatology. Inflammatory bowel disease was confirmed by colonoscopy. BMI; body mass index, TJC; tender joint count, SJC; swollen joint count, MACE; major adverse cardiovascular event, csDMARDs; conventional synthetic disease modifying antirheumatic drugs, bDMARDs; biologic DMARDs, n; number, SD; standard deviation, IQR; interquartile range. Significant differences are presented in bold.

**Table S2** Simple and multiple logistic regression to assess for factors associated with late-onset PsA. Patients diagnosed after the age of >46 years versus those diagnosed at an age of ≤46 years.

|                           | <b>Crude OR<br/>(95% CI)</b> | <b>p-value</b>   | <b>Adjusted OR<br/>(95% CI)</b> | <b>p-value</b>   |
|---------------------------|------------------------------|------------------|---------------------------------|------------------|
| Female sex                | 1.22 (0.76-1.96)             | 0.406            | 1.41 (0.82-2.42)                | 0.201            |
| Disease duration (months) | 0.997 (0.994-0.999)          | <b>0.018</b>     | 0.995 (0.992-0.998)             | <b>0.002</b>     |
| Hypertension              | 3.84 (2.24-6.57)             | <b>&lt;0.001</b> | 3.18 (1.71-5.91)                | <b>&lt;0.001</b> |
| Dyslipidemia              | 3.05 (1.87-4.98)             | <b>&lt;0.001</b> | 2.26 (1.31-3.89)                | <b>0.003</b>     |
| Diabetes                  | 2.76 (1.41-5.39)             | <b>0.003</b>     | 1.52 (0.70-3.31)                | 0.282            |
| MACE                      | 3.17 (1.12-8.92)             | <b>0.028</b>     | 1.76 (0.57-5.40)                | 0.319            |

OR; odds ratio, CI; confidence interval, MACE; major adverse cardiovascular event. Significant differences are presented in bold.
